# Supplementary material for: Effect of Temperature and Photoperiod on Development, Survival, and Growth Rate of Mealworms, Tenebrio molitor
Source: MDPI journal article supplement (doi:10.3390/insects13040321), 2022-03-24
Supplement: s1 [file s1]

**File S2**

Results of survival rates, developmental times, and growth rates of *Tenebrio molitor* larvae at 20 °C, 25 °C, and 30 °C, and long-day LD, short-day SD, and constant darkness 24D.

**Table S1** Survival rates (mean values  $\pm$  standard deviation in %) of mealworms at 20 °C, 25 °C, and 30 °C and LD, SD, and 24D photoperiods. n = number of plastic boxes per treatment; individuals = total number of investigated larvae. For detail on significant differences, see Supplement 3.

| Temperature | Photoperiod  | Mean $\pm$ SD                    | n  | Individuals |
|-------------|--------------|----------------------------------|----|-------------|
| 20 °C       | LD           | 93.8 $\pm$ 5.8                   | 10 | 192         |
|             | SD           | 91.9 $\pm$ 7.6                   | 10 | 199         |
|             | 24D          | 90.4 $\pm$ 7.6                   | 10 | 196         |
| 25 °C       | LD           | 96.5 $\pm$ 4.7                   | 10 | 200         |
|             | SD           | 96 $\pm$ 5.2                     | 10 | 200         |
|             | 24D          | 98.5 $\pm$ 2.4                   | 10 | 199         |
| 30 °C       | LD           | 94.1 $\pm$ 7.7                   | 10 | 196         |
|             | SD           | 97.5 $\pm$ 3.6                   | 10 | 198         |
|             | 24D          | 98.5 $\pm$ 3.4                   | 10 | 199         |
| 20 °C       | All          | <b>92 <math>\pm</math> 7.0</b>   | 30 | 587         |
| 25 °C       | All          | <b>97 <math>\pm</math> 4.3</b>   | 30 | 599         |
| 30 °C       | All          | <b>96.7 <math>\pm</math> 5.4</b> | 30 | 593         |
| All         | LD           | <b>94.8 <math>\pm</math> 6.1</b> | 30 | 588         |
|             | SD           | <b>95.1 <math>\pm</math> 6</b>   | 30 | 597         |
|             | 24D          | <b>95.8 <math>\pm</math> 6.2</b> | 30 | 594         |
|             | Overall mean | <b>95.2 <math>\pm</math> 6</b>   | 90 | 1779        |

**Table S2** Developmental time (mean values  $\pm$  standard deviation in days) of mealworms at three temperatures (20 °C, 25 °C, and 30 °C) and three photoperiods (long day LD, short day SD, and darkness 24D). n = number of plastic boxes per treatment; individuals = total number of investigated larvae. For details on significant differences among experimental conditions, see Supplement 4.

| Temperature | Photoperiod | Mean $\pm$ SD                      | n  | Individuals |
|-------------|-------------|------------------------------------|----|-------------|
| 20 °C       | LD          | 188.9 $\pm$ 4.5                    | 10 | 180         |
|             | SD          | 176.4 $\pm$ 5.9                    | 10 | 183         |
|             | 24D         | 189 $\pm$ 5.2                      | 10 | 177         |
| 25 °C       | LD          | 141.5 $\pm$ 7.5                    | 10 | 193         |
|             | SD          | 146.8 $\pm$ 5.6                    | 10 | 192         |
|             | 24D         | 125.6 $\pm$ 4.2                    | 10 | 196         |
| 30 °C       | LD          | 139.8 $\pm$ 8.3                    | 10 | 185         |
|             | SD          | 132.5 $\pm$ 10.1                   | 10 | 193         |
|             | 24D         | 136.3 $\pm$ 6.4                    | 10 | 196         |
| 20 °C       | All         | <b>184.8 <math>\pm</math> 7.9</b>  | 30 | 540         |
| 25 °C       | All         | <b>138 <math>\pm</math> 10.8</b>   | 30 | 581         |
| 30 °C       | All         | <b>136.2 <math>\pm</math> 8.7</b>  | 30 | 574         |
| All         | LD          | <b>156.7 <math>\pm</math> 24.1</b> | 30 | 558         |
|             | SD          | <b>151.9 <math>\pm</math> 20</b>   | 30 | 568         |

|                 |                     |    |      |
|-----------------|---------------------|----|------|
| 24D             | <b>150.3 ± 28.7</b> | 30 | 569  |
| Overall<br>mean | <b>153 ± 24.4</b>   | 90 | 1695 |

**Table S3** Growth rate (mean values ± standard deviation in %) of mealworms at three temperature regimes (20 °C, 25 °C, and 30 °C) and three photoperiods long day LD, short day SD, and darkness 24D. n = number of plastic boxes per treatment; individuals = total number of investigated larvae. For details on significant differences among experimental conditions, see Supplement 5.

| <b>Temperature</b> | <b>Photoperiod</b> | <b>Mean ± SD</b>  | <b>n</b> | <b>Individuals</b> |
|--------------------|--------------------|-------------------|----------|--------------------|
| 20 °C              | LD                 | 23.7 ± 1.1        | 10       | 171                |
|                    | SD                 | 27 ± 1.1          | 10       | 177                |
|                    | 24D                | 24.8 ± 1.3        | 10       | 169                |
| 25 °C              | LD                 | 35.1 ± 3.4        | 10       | 186                |
|                    | SD                 | 32.3 ± 2.6        | 10       | 183                |
|                    | 24D                | 41.2 ± 1.6        | 10       | 188                |
| 30 °C              | LD                 | 38.8 ± 2.7        | 10       | 177                |
|                    | SD                 | 37.7 ± 3.5        | 10       | 184                |
|                    | 24D                | 41.1 ± 3.7        | 10       | 188                |
| 20 °C              | All                | <b>25.1 ± 1.8</b> | 30       | 517                |
| 25 °C              | All                | <b>36.2 ± 4.5</b> | 30       | 557                |
| 30 °C              | All                | <b>39.2 ± 3.5</b> | 30       | 549                |
| All                | LD                 | <b>32.5 ± 7</b>   | 30       | 534                |
|                    | SD                 | <b>32.3 ± 5.1</b> | 30       | 544                |
|                    | 24D                | <b>35.7 ± 8.2</b> | 30       | 545                |
|                    | Overall<br>mean    | <b>33.5 ± 7.0</b> | 90       | 1623               |
