# Supplementary material for: Effect of Temperature and Photoperiod on Development, Survival, and Growth Rate of Mealworms, Tenebrio molitor
Source: Insects. 2022 Mar 24;13(4):321. doi: 10.3390/insects13040321 (PMC9029539; doi:10.3390/insects13040321)
Supplement: Supplementary file 1 [file insects-13-00321-s001.zip]

Archive with 5 entries (5 files):
- File S1.pdf
- File S2.pdf
- Table S4.xlsx
- Table S5.xlsx
- Table S6.xlsx
