# Supplementary material for: Effect of Temperature and Photoperiod on Development, Survival, and Growth Rate of Mealworms, Tenebrio molitor
Source: Insects. 2022 Mar 24;13(4):321. doi: 10.3390/insects13040321 (PMC9029539; doi:10.3390/insects13040321)
Supplement: Supplementary file 1 [file insects-13-00321-s001.zip › Table S4.xlsx]

## Sheet: Tabelle1
Table S4. Significance values among mean survival rates at 20 °C, 25 °C and 30 °C, and long-day LD, short-day SD and constant darkness 24D.
Experimental condition		p-value
20 °C/LD	20 °C/SD	0.998049
	20 °C/24D	0.915621
	25 °C/LD	0.976823
	25 °C/SD	0.993789
	25 °C/24D	0.642124
	30 °C/LD	1
	30 °C/SD	0.872289
	30 °C/24D	0.642124
20 °C/SD	20 °C/LD	0.998049
	20 °C/24D	0.99955
	25 °C/LD	0.676248
	25 °C/SD	0.795869
	25 °C/24D	0.203394
	30 °C/LD	0.993481
	30 °C/SD	0.419696
	30 °C/24D	0.203394
20 °C/24D	20 °C/LD	0.915621
	20 °C/SD	0.99955
	25 °C/LD	0.291999
	25 °C/SD	0.406725
	25 °C/24D	0.0480734
	30 °C/LD	0.860503
	30 °C/SD	0.132545
	30 °C/24D	0.0480734
25 °C/LD	20 °C/LD	0.976823
	20 °C/SD	0.676248
	20 °C/24D	0.291999
	25 °C/SD	1
	25 °C/24D	0.996863
	30 °C/LD	0.990575
	30 °C/SD	0.999985
	30 °C/24D	0.996863
25 °C/SD	20 °C/LD	0.993789
	20 °C/SD	0.795869
	20 °C/24D	0.406725
	25 °C/LD	1
	25 °C/24D	0.986035
	30 °C/LD	0.998164
	30 °C/SD	0.999651
	30 °C/24D	0.986035
25 °C/24D	20 °C/LD	0.642124
	20 °C/SD	0.203394
	20 °C/24D	0.0480734
	25 °C/LD	0.996863
	25 °C/SD	0.986035
	30 °C/LD	0.732833
	30 °C/SD	0.999978
	30 °C/24D	1
30 °C/LD	20 °C/LD	1
	20 °C/SD	0.993481
	20 °C/24D	0.860503
	25 °C/LD	0.990575
	25 °C/SD	0.998164
	25 °C/24D	0.732833
	30 °C/SD	0.924221
	30 °C/24D	0.732833
30 °C/SD	20 °C/LD	0.872289
	20 °C/SD	0.419696
	20 °C/24D	0.132545
	25 °C/LD	0.999985
	25 °C/SD	0.999651
	25 °C/24D	0.999978
	30 °C/LD	0.924221
	30 °C/24D	0.999978
30 °C/24D	20 °C/LD	0.642124
	20 °C/SD	0.203394
	20 °C/24D	0.0480734
	25 °C/LD	0.996863
	25 °C/SD	0.986035
	25 °C/24D	1
	30 °C/LD	0.732833
	30 °C/SD	0.999978
