# Supplementary material for: Effect of Temperature and Photoperiod on Development, Survival, and Growth Rate of Mealworms, Tenebrio molitor
Source: Insects. 2022 Mar 24;13(4):321. doi: 10.3390/insects13040321 (PMC9029539; doi:10.3390/insects13040321)
Supplement: Supplementary file 1 [file insects-13-00321-s001.zip › Table S5.xlsx]

## Sheet: Tabelle1
Table S5. Significance values among mean developmental times at 20 °C, 25 °C and 30 °C, and long-day LD, short-day SD and constant darkness 24D.
Experimental condition		p-value
20 °C/LD	20 °C/SD	0.00217493
	20 °C/24D	1
	25 °C/LD	5.49893e-13
	25 °C/SD	5.49893e-13
	25 °C/24D	5.49893e-13
	30 °C/LD	5.49893e-13
	30 °C/SD	5.49893e-13
	30 °C/24D	5.49893e-13
20 °C/SD	20 °C/LD	0.00217493
	20 °C/24D	0.00190605
	25 °C/LD	5.49893e-13
	25 °C/SD	5.97411e-13
	25 °C/24D	5.49893e-13
	30 °C/LD	5.49893e-13
	30 °C/SD	5.49893e-13
	30 °C/24D	5.49893e-13
20 °C/24D	20 °C/LD	1
	20 °C/SD	0.00190605
	25 °C/LD	5.49893e-13
	25 °C/SD	5.49893e-13
	25 °C/24D	5.49893e-13
	30 °C/LD	5.49893e-13
	30 °C/SD	5.49893e-13
	30 °C/24D	5.49893e-13
25 °C/LD	20 °C/LD	5.49893e-13
	20 °C/SD	5.49893e-13
	20 °C/24D	5.49893e-13
	25 °C/SD	0.703013
	25 °C/24D	2.96739e-05
	30 °C/LD	0.999708
	30 °C/SD	0.0749928
	30 °C/24D	0.712536
25 °C/SD	20 °C/LD	5.49893e-13
	20 °C/SD	5.97411e-13
	20 °C/24D	5.49893e-13
	25 °C/LD	0.703013
	25 °C/24D	1.55686e-08
	30 °C/LD	0.333744
	30 °C/SD	0.000237857
	30 °C/24D	0.0194084
25 °C/24D	20 °C/LD	5.49893e-13
	20 °C/SD	5.49893e-13
	20 °C/24D	5.49893e-13
	25 °C/LD	2.96739e-05
	25 °C/SD	1.55686e-08
	30 °C/LD	0.000274586
	30 °C/SD	0.35568
	30 °C/24D	0.0162653
30 °C/LD	20 °C/LD	5.49893e-13
	20 °C/SD	5.49893e-13
	20 °C/24D	5.49893e-13
	25 °C/LD	0.999708
	25 °C/SD	0.333744
	25 °C/24D	0.000274586
	30 °C/SD	0.26518
	30 °C/24D	0.957727
30 °C/SD	20 °C/LD	5.49893e-13
	20 °C/SD	5.49893e-13
	20 °C/24D	5.49893e-13
	25 °C/LD	0.0749928
	25 °C/SD	0.000237857
	25 °C/24D	0.35568
	30 °C/LD	0.26518
	30 °C/24D	0.93429
30 °C/24D	20 °C/LD	5.49893e-13
	20 °C/SD	5.49893e-13
	20 °C/24D	5.49893e-13
	25 °C/LD	0.712536
	25 °C/SD	0.0194084
	25 °C/24D	0.0162653
	30 °C/LD	0.957727
	30 °C/SD	0.93429
