# Supplementary material for: Effect of Temperature and Photoperiod on Development, Survival, and Growth Rate of Mealworms, Tenebrio molitor
Source: Insects. 2022 Mar 24;13(4):321. doi: 10.3390/insects13040321 (PMC9029539; doi:10.3390/insects13040321)
Supplement: Supplementary file 1 [file insects-13-00321-s001.zip › Table S6.xlsx]

## Sheet: Tabelle1
Table S6. Significance values among mean growth rates at 20 °C, 25 °C and 30 °C, and long-day LD, short-day SD and constant darkness 24D.
Experimental condition		p-value
20 °C/LD	20 °C/SD	0.0955475
	20 °C/24D	0.987732
	25 °C/LD	5.71099e-13
	25 °C/SD	1.4334e-09
	25 °C/24D	5.49893e-13
	30 °C/LD	5.49893e-13
	30 °C/SD	5.49893e-13
	30 °C/24D	5.49893e-13
20 °C/SD	20 °C/LD	0.0955475
	20 °C/24D	0.570224
	25 °C/LD	1.32065e-08
	25 °C/SD	0.000353362
	25 °C/24D	5.49893e-13
	30 °C/LD	5.54112e-13
	30 °C/SD	8.99281e-13
	30 °C/24D	5.49893e-13
20 °C/24D	20 °C/LD	0.987732
	20 °C/SD	0.570224
	25 °C/LD	2.33458e-12
	25 °C/SD	1.06591e-07
	25 °C/24D	5.49893e-13
	30 °C/LD	5.49893e-13
	30 °C/SD	5.50004e-13
	30 °C/24D	5.49893e-13
25 °C/LD	20 °C/LD	5.71099e-13
	20 °C/SD	1.32065e-08
	20 °C/24D	2.33458e-12
	25 °C/SD	0.277478
	25 °C/24D	2.46911e-05
	30 °C/LD	0.0387319
	30 °C/SD	0.340418
	30 °C/24D	3.34862e-05
25 °C/SD	20 °C/LD	1.4334e-09
	20 °C/SD	0.000353362
	20 °C/24D	1.06591e-07
	25 °C/LD	0.277478
	25 °C/24D	6.21148e-10
	30 °C/LD	6.01486e-06
	30 °C/SD	0.000272685
	30 °C/24D	8.73732e-10
25 °C/24D	20 °C/LD	5.49893e-13
	20 °C/SD	5.49893e-13
	20 °C/24D	5.49893e-13
	25 °C/LD	2.46911e-05
	25 °C/SD	6.21148e-10
	30 °C/LD	0.483668
	30 °C/SD	0.071379
	30 °C/24D	1
30 °C/LD	20 °C/LD	5.49893e-13
	20 °C/SD	5.54112e-13
	20 °C/24D	5.49893e-13
	25 °C/LD	0.0387319
	25 °C/SD	6.01486e-06
	25 °C/24D	0.483668
	30 °C/SD	0.988652
	30 °C/24D	0.534465
30 °C/SD	20 °C/LD	5.49893e-13
	20 °C/SD	8.99281e-13
	20 °C/24D	5.50004e-13
	25 °C/LD	0.340418
	25 °C/SD	0.000272685
	25 °C/24D	0.071379
	30 °C/LD	0.988652
	30 °C/24D	0.0863604
30 °C/24D	20 °C/LD	5.49893e-13
	20 °C/SD	5.49893e-13
	20 °C/24D	5.49893e-13
	25 °C/LD	3.34862e-05
	25 °C/SD	8.73732e-10
	25 °C/24D	1
	30 °C/LD	0.534465
	30 °C/SD	0.0863604
